# Supplementary figures and images for: Strong and oriented immobilization of single domain antibodies from crude bacterial lysates for high-throughput compatible cost-effective antibody array generation
Source: Royal Society of Chemistry journal article supplement (doi:10.1039/c005279e), 2010-09-21

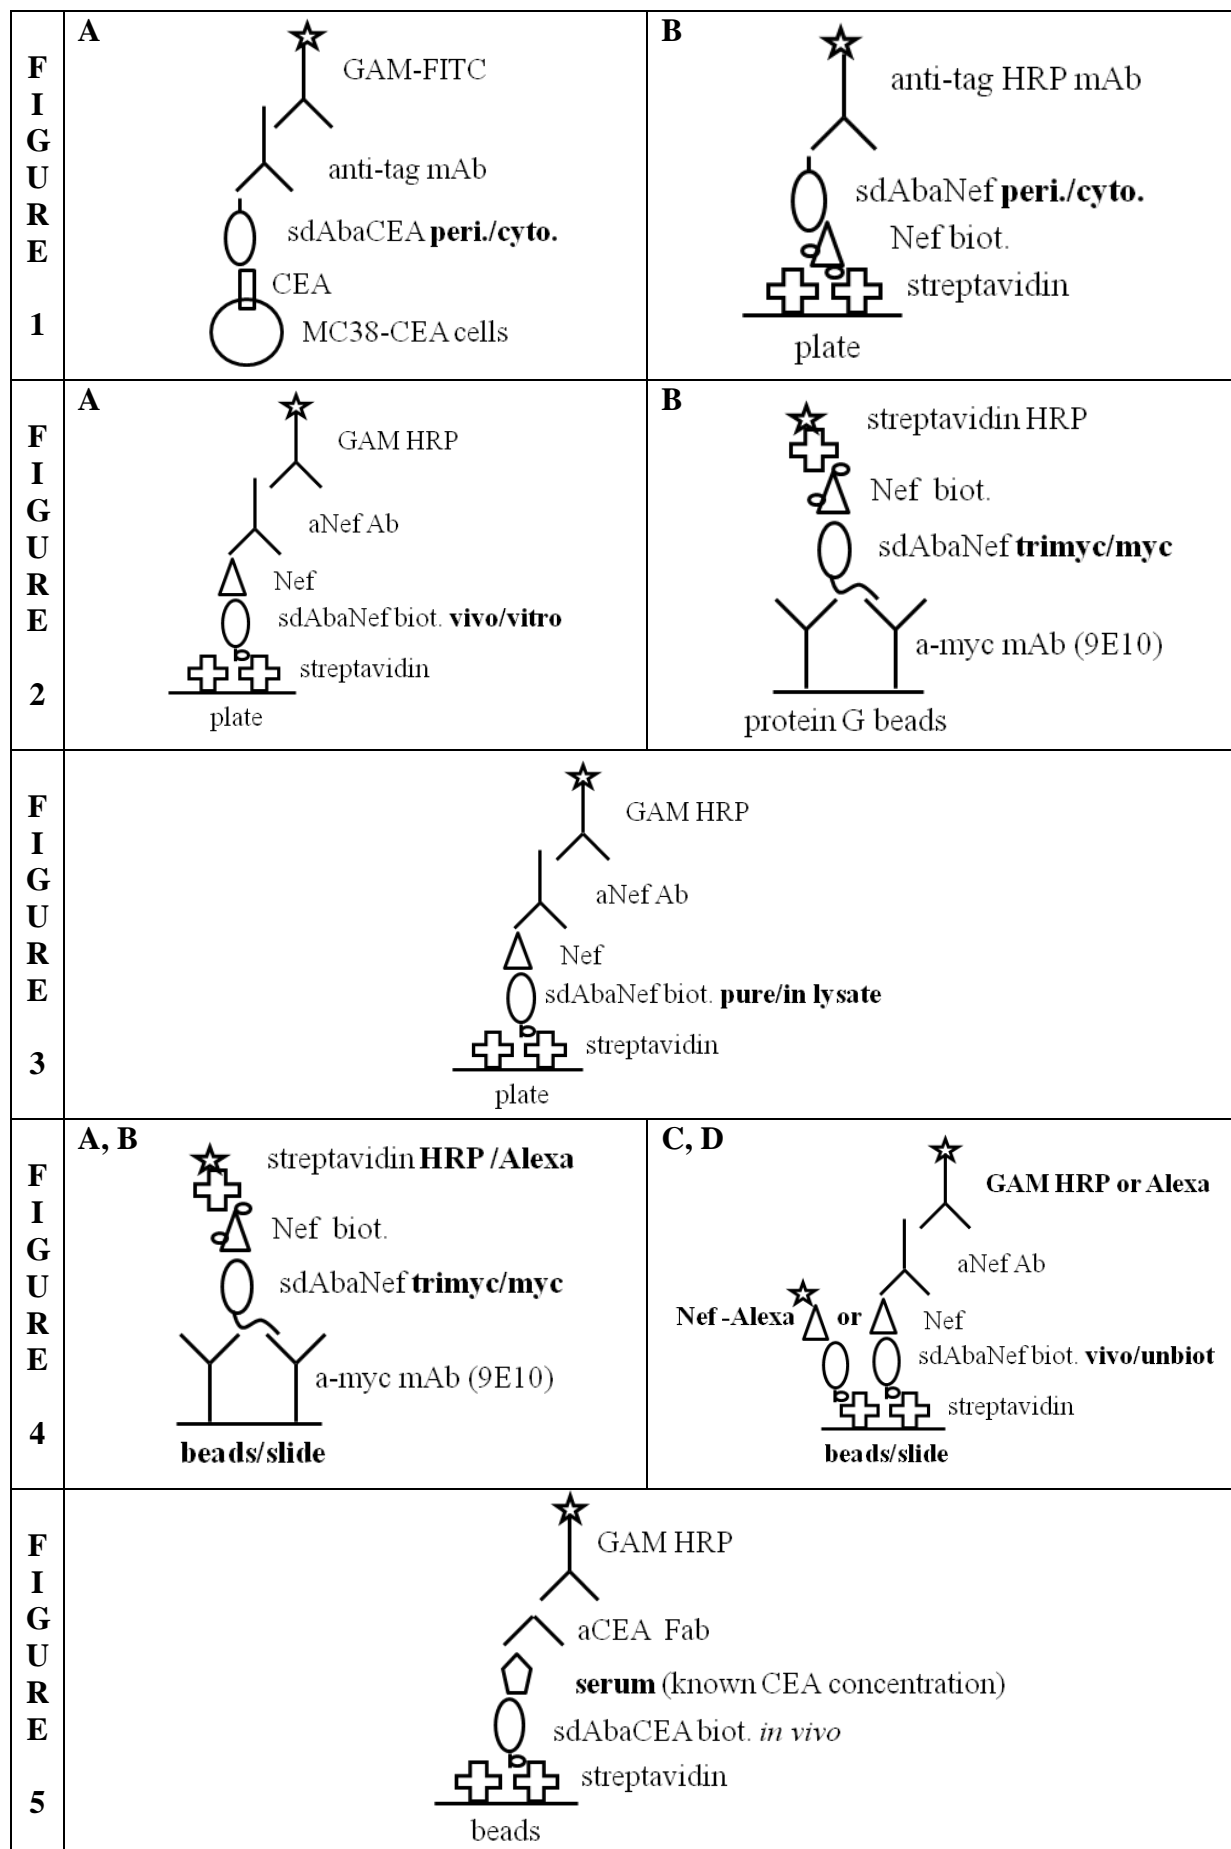

**Figure S1 : Scheme of the various assays**

Supplement: c005279e.pdf [file c005279e.pdf]
